# Supplementary material for: The Role of CCL24 in Primary Sclerosing Cholangitis: Bridging Patient Serum Proteomics to Preclinical Data
Source: MDPI journal article supplement (doi:10.3390/cells13030209), 2024-01-23
Supplement: s1 [file s1]

# Supplemental Data

Fig. S1

A

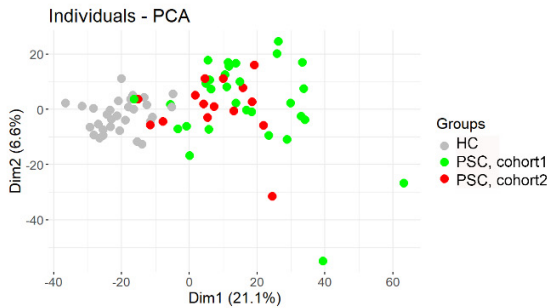

B

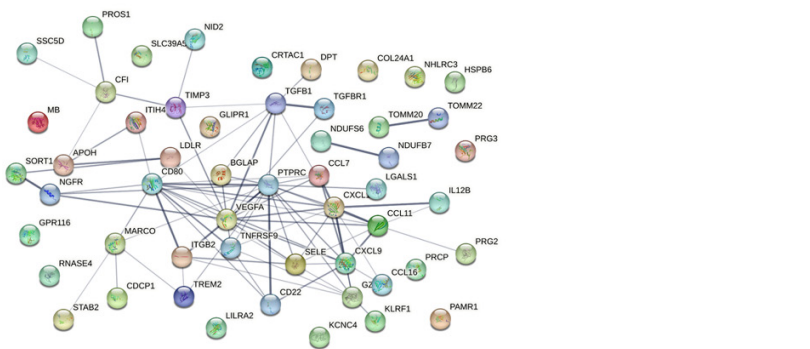

C

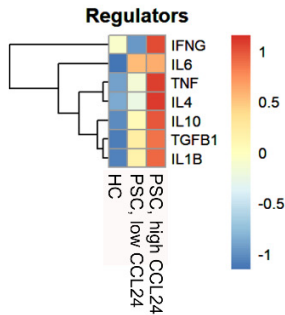

D

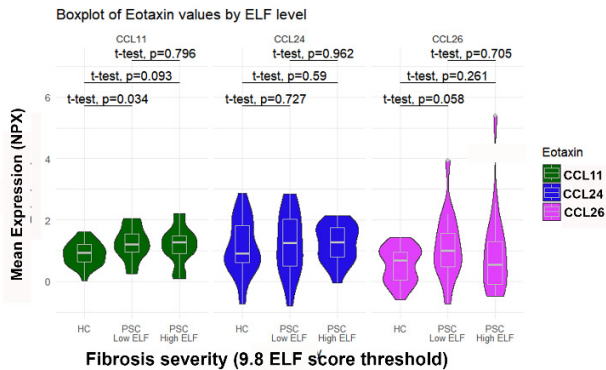

**Fig S1. PSC-related canonical pathways are upregulated in patients with PSC and associated with CCL24 levels.** (A) Score plots of principal component analysis of proteome profiles in HC cohort and two cohorts of Patients with PSC. (B) Protein-protein interaction network of top 50 proteins that positively correlate with CCL24. (C) Serum levels of the upstream regulators presented as hierarchically-clustered heatmap of scaled expression. (D) Expression levels of CCL11, CCL24 and CCL26, stratified by ELF score. Boxes represent interquartile ranges with medians (n = 15-18).

**Fig. S2**

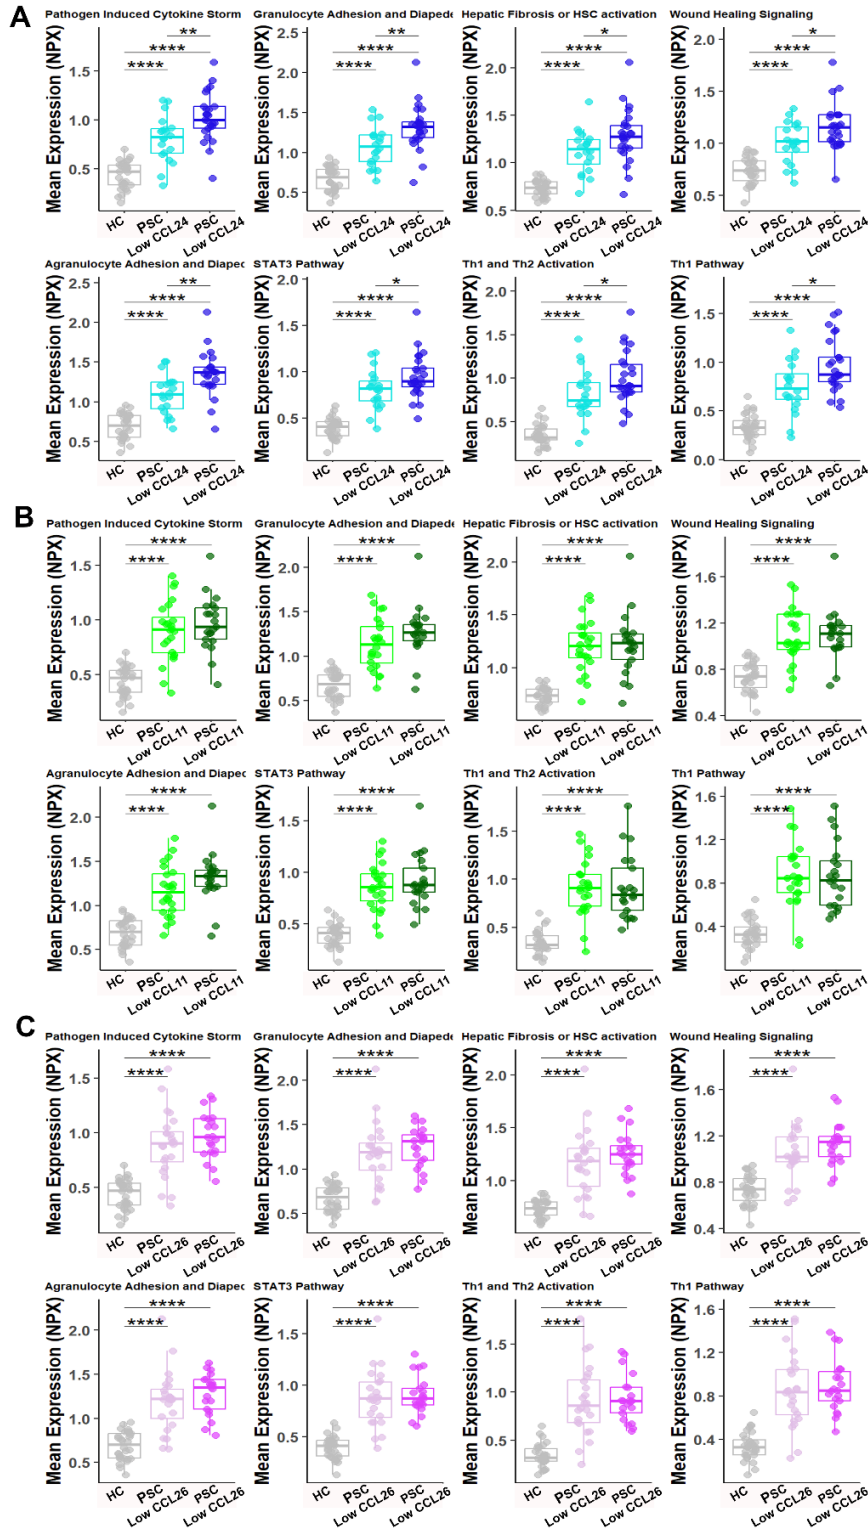

**Fig S2. PSC-related canonical pathways are upregulated in patients with PSC and associated with CCL24 levels.** The average expression of protein signatures of specific canonical pathways is presented in HC vs. patients with PSC; patients with PSC are stratified by mean expression of each of the three eotaxins: CCL24 (A), CCL11 (B) and CCL26 (C). Boxes represent interquartile ranges with medians (n = 20-30). \*,  $p < 0.05$ ; \*\*,  $p < 0.01$ ; \*\*\*\*,  $p < 0.0001$ . HC, healthy controls.

Fig. S3

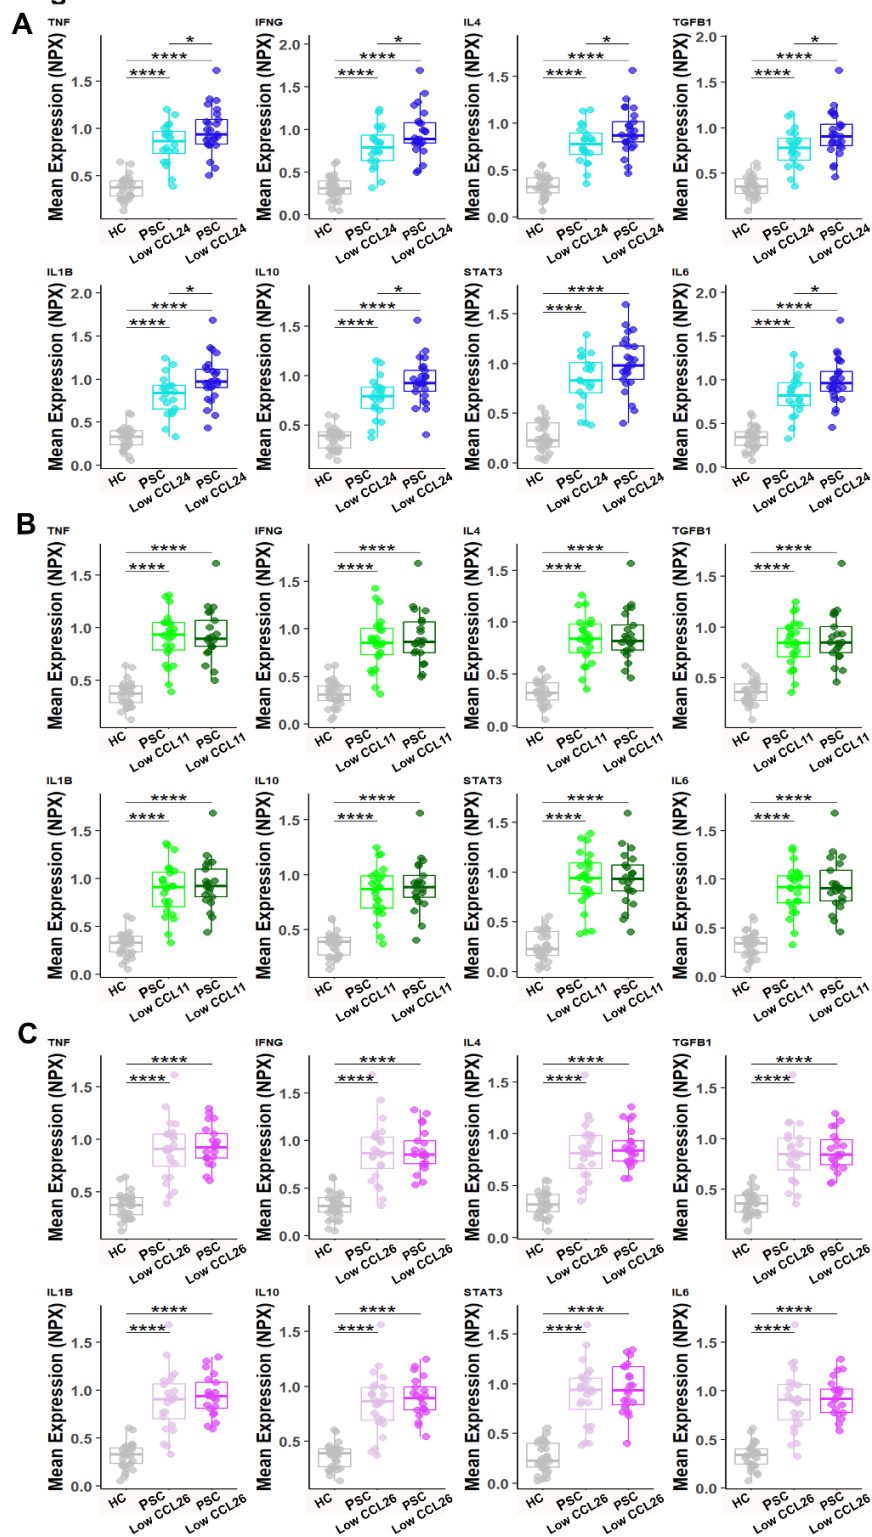

**Fig S3. PSC-related upstream regulators are upregulated in patients with PSC and associated with CCL24 levels.** The average expression of protein signatures of specific upstream regulators is presented in HC vs. patients with PSC; patients with PSC are stratified by mean expression of each of the three eotaxins: CCL24 (A), CCL11 (B) and CCL26 (C). Boxes represent interquartile ranges with medians (n = 20-30). \*,  $p < 0.05$ ; \*\*,  $p < 0.01$ ; \*\*\*\*,  $p < 0.0001$ .

Fig. S4

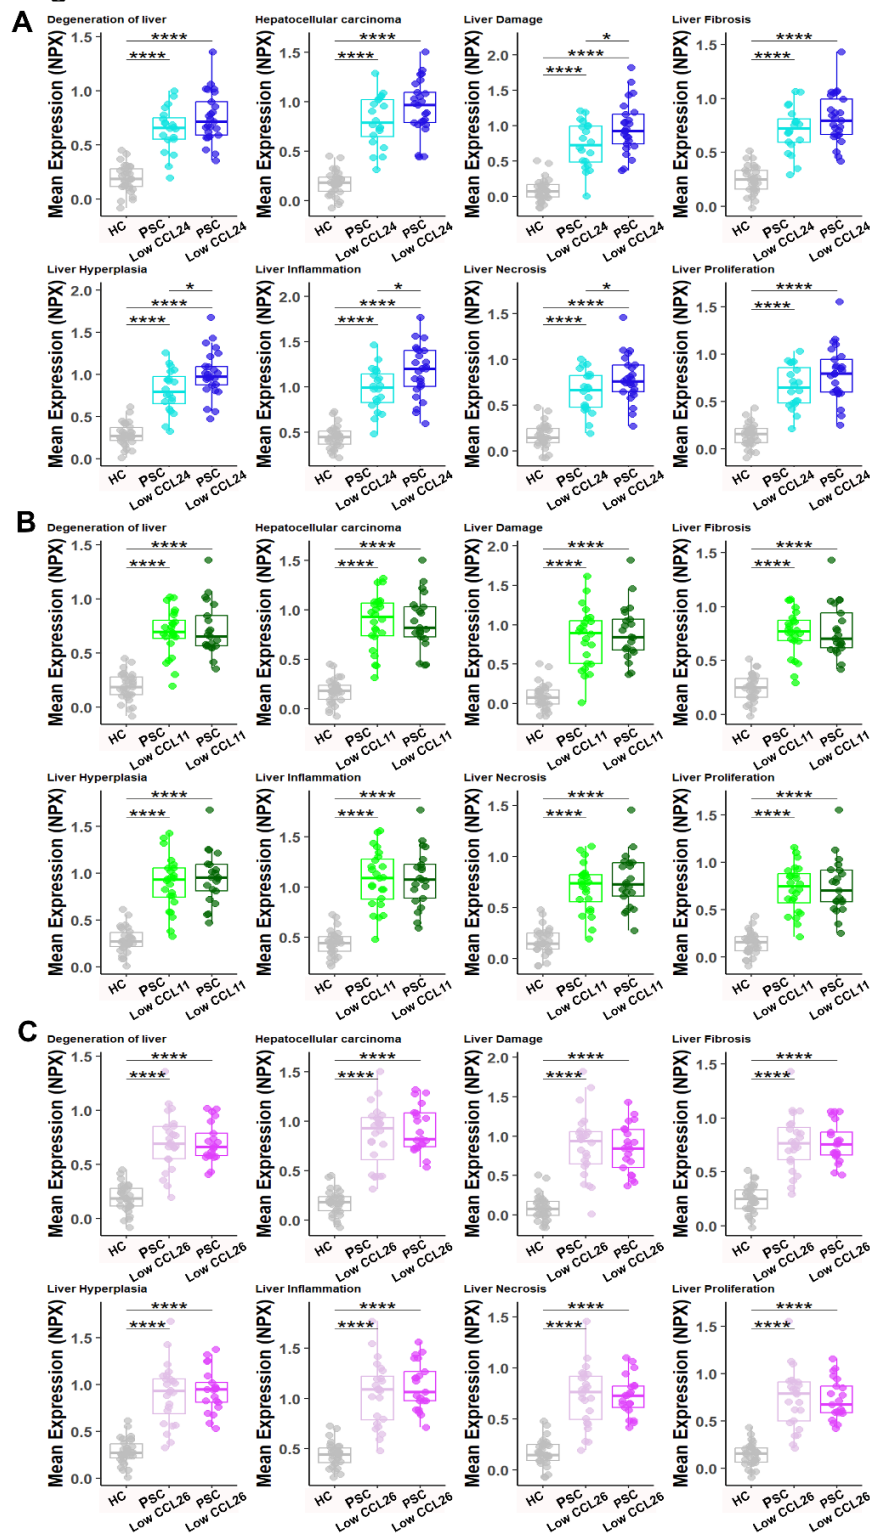



**Fig S4. PSC-related toxicity functions are upregulated in patients with PSC and associated with CCL24 levels.** The average expression of protein signatures of specific liver-related toxicity functions is presented in HC vs. patients with PSC; patients with PSC are stratified by mean expression of each of the three eotaxins: CCL24 (A), CCL11 (B) and CCL26 (C). Boxes represent interquartile ranges with medians (n = 20-30). \*,  $p < 0.05$ ; \*\*,  $p < 0.01$ ; \*\*\*\*,  $p < 0.0001$ .

**Fig. S5**

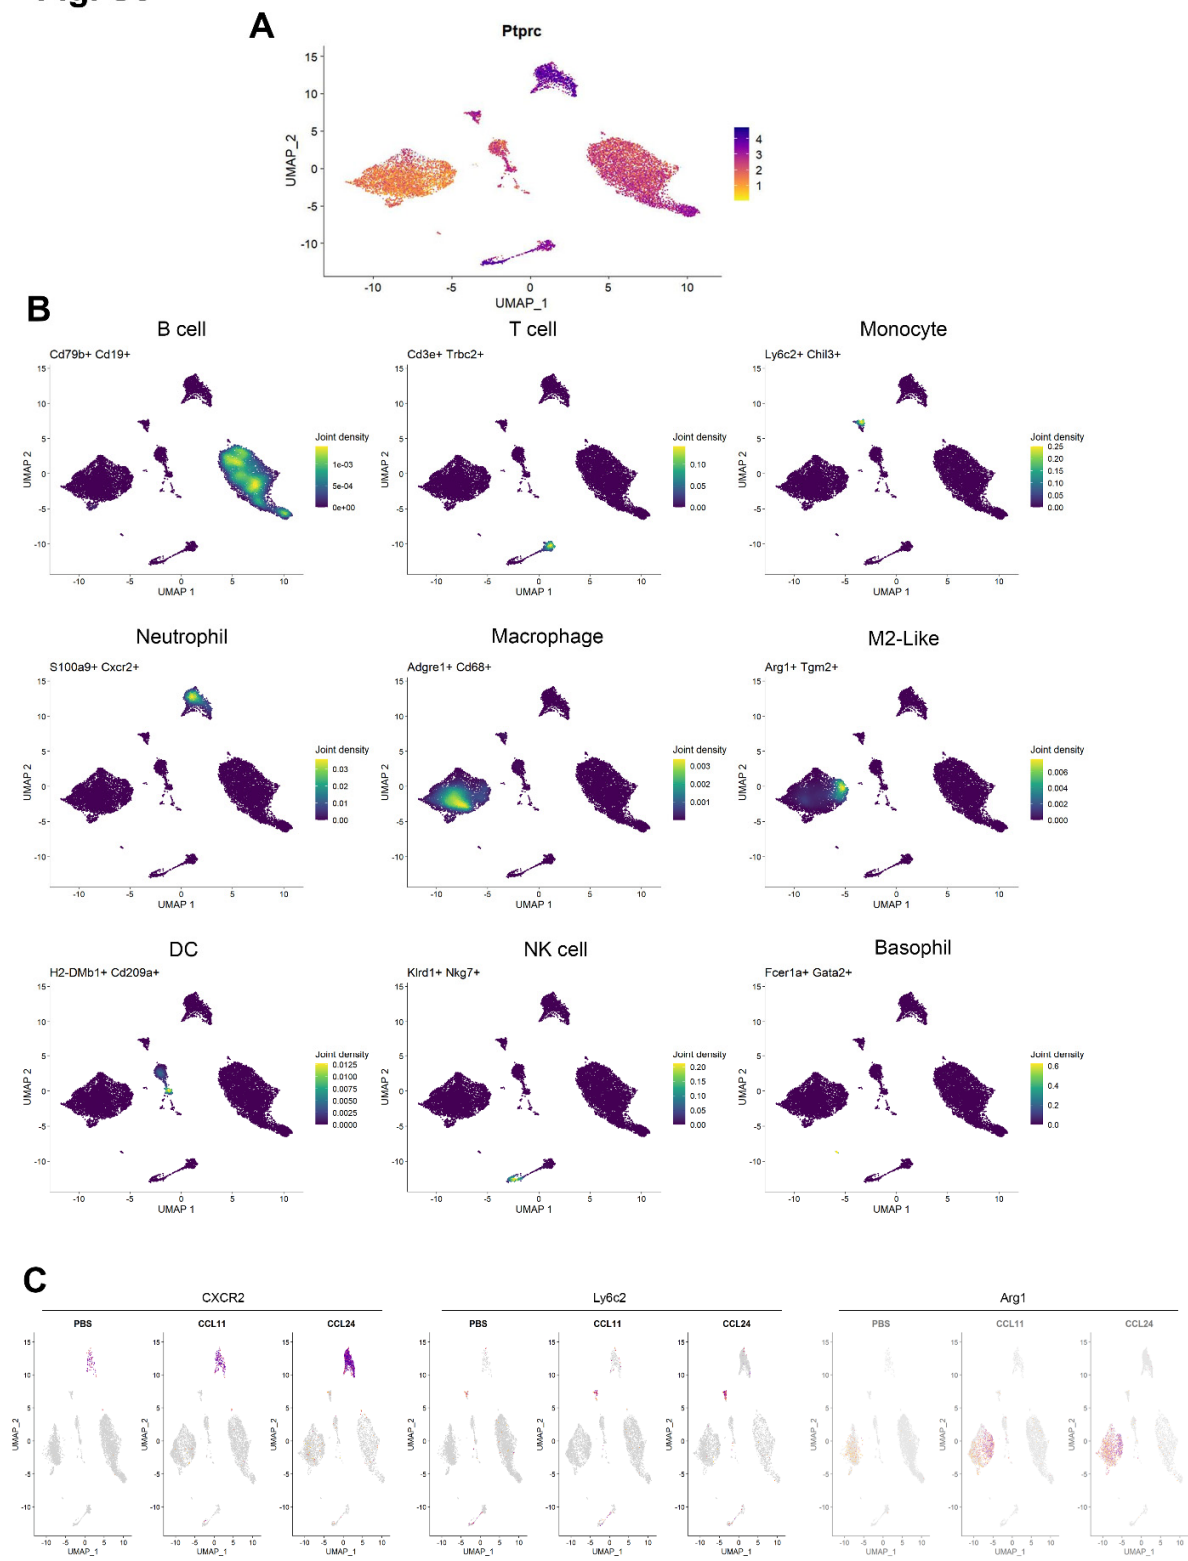

**Fig S5. scRNA-seq of peritoneal fluid following injection of PBS, CCL11 or CCL24.** (A) Expression of Ptpnc (CD45) showing a ubiquitous expression pattern. (B) Joint density plots of canonical cell-type marker pairs. (C) Feature plots of selected genes, demonstrating the difference in expression by treatment.

**Fig S6**

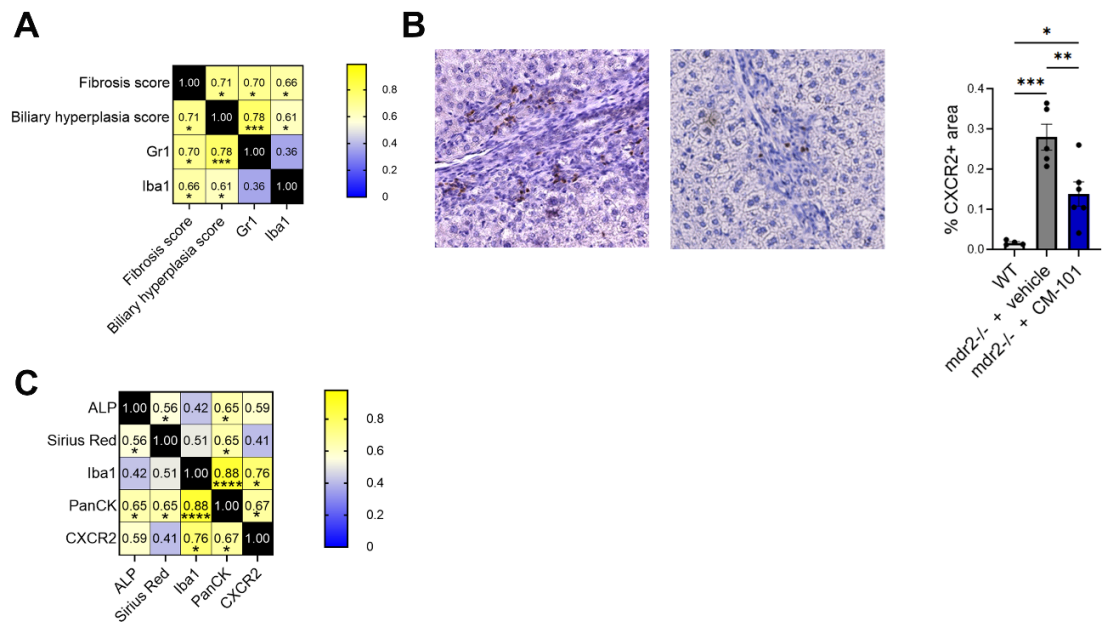

**Fig S6. CCL24 neutralization with CM-101 attenuated experimental sclerosing cholangitis progression.** (A) Correlation (Spearman) matrix in ANIT-cholestasis model between fibrosis score, biliary hyperplasia score, Iba1 positive stain area and Gr1 positive stain area. (B) CXCR2 IHC in peribiliary area of Mdr2<sup>-/-</sup> cholestasis model. Data are represented as mean  $\pm$  SEM (n = 4-6). (C) Correlation (Spearman) matrix in of Mdr2<sup>-/-</sup> cholestasis model between serum ALP levels, Sirius Red positive stain area, Iba1 positive stain area, PanCK positive stain area and CXCR2 positive stain area. \*, p < 0.05; \*\*, p < 0.01; \*\*\*, p < 0.001; \*\*\*\*, p < 0.0001.

Fig S7  
A

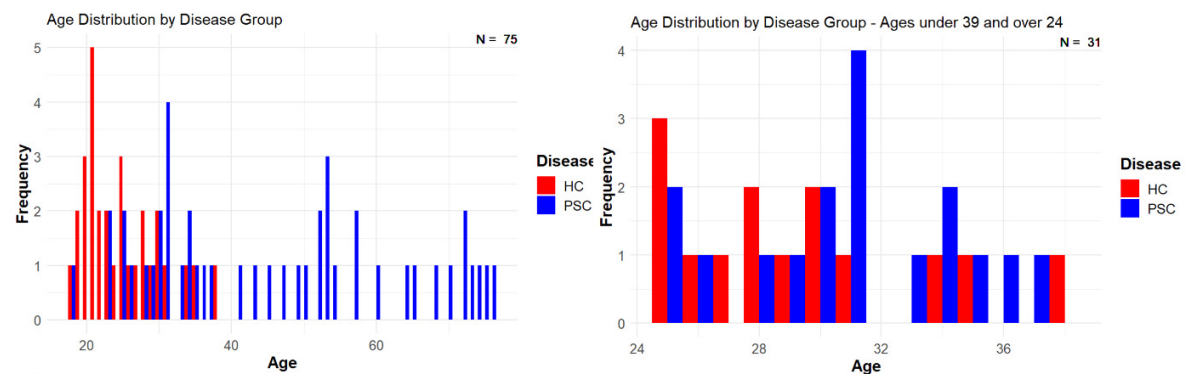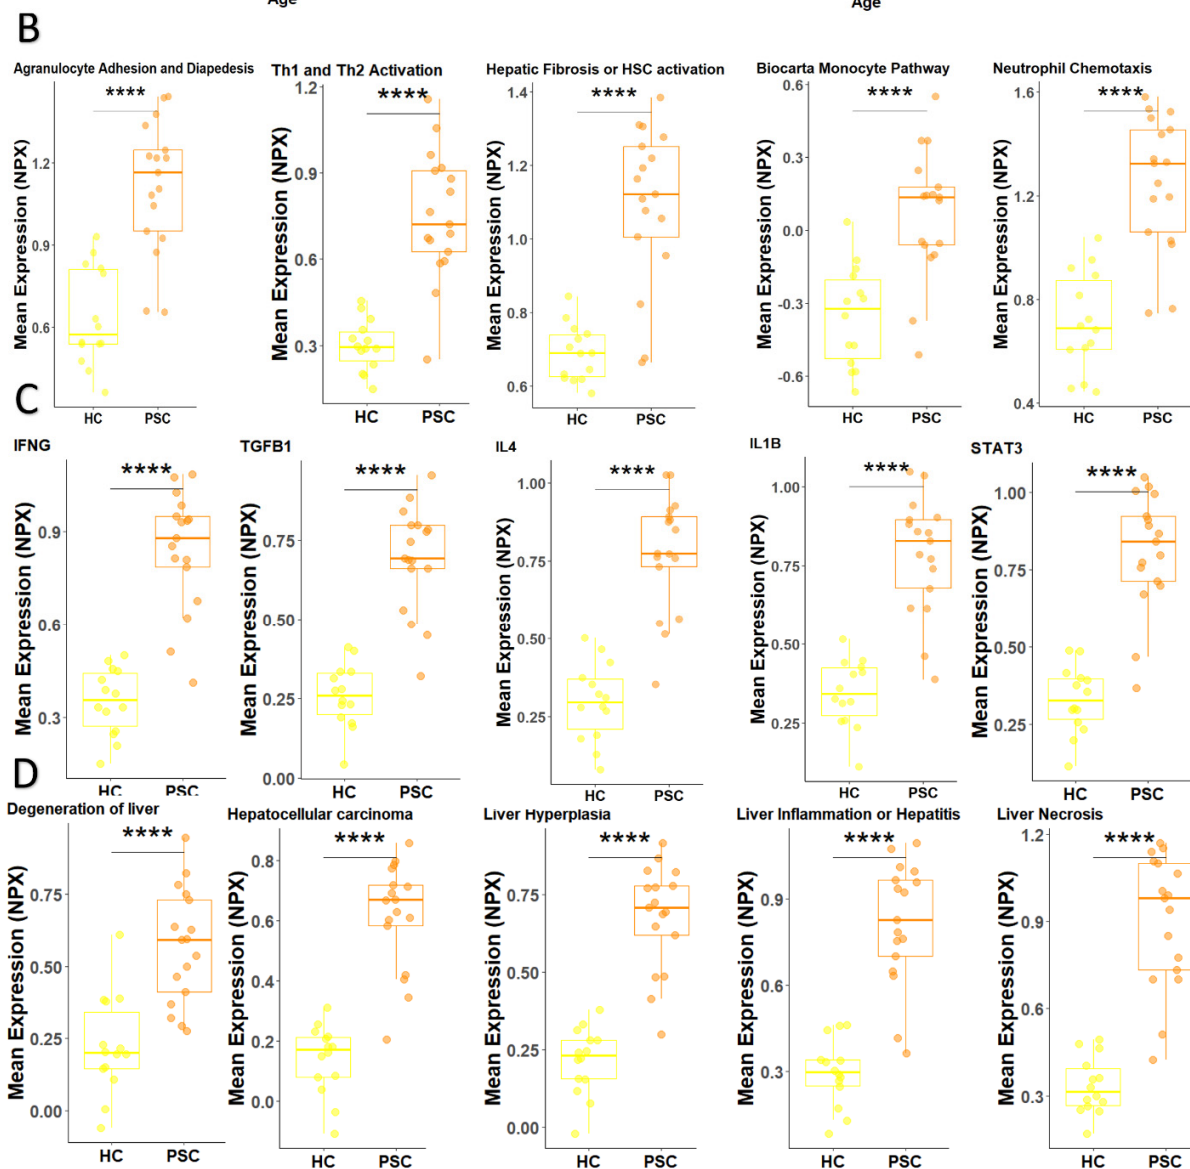

**Fig S7. PSC-related canonical pathways, upstream regulators and liver toxicity functions are upregulated in a subset of age-matched population.** (A) Histogram showing the age distribution of healthy controls (red) and PSC patients (blue) of the entire study population (on the left) and the age-matched subset (on the right). (B) Boxplots of the mean expression (in NPX) of IPA canonical pathways, limited to the age matched subset population. (C) Boxplots of the mean expression (in NPX) of IPA upstream regulators, limited to the age matched subset population. (D) Boxplots of the mean expression (in NPX) of IPA toxicity functions, limited to the age matched subset population. Boxes represent interquartile ranges with medians (n = 14-17). \*\*\*\*,  $p < 0.0001$

|             | r Pearson |
|-------------|-----------|
| CCL24       | 1         |
| TIMP3       | 0.6837    |
| DPT         | 0.524211  |
| APOH        | 0.51403   |
| MB          | 0.50145   |
| CCL7        | 0.499525  |
| CXCL9       | 0.496228  |
| CXCL10      | 0.483641  |
| HSPB6       | 0.468124  |
| IL12B       | 0.467865  |
| CDCP1       | 0.458641  |
| PTPRC       | 0.448785  |
| GZMA        | 0.442174  |
| LILRA2      | 0.440227  |
| SORT1       | 0.438523  |
| PAMR1       | 0.438169  |
| VEGFA       | 0.438037  |
| SELE        | 0.437231  |
| NID2        | 0.432083  |
| TNFRSF9     | 0.429871  |
| GLIPR1      | 0.420759  |
| CCL11       | 0.418842  |
| PRG2        | 0.418702  |
| LDLR        | 0.416172  |
| COL24A1     | 0.414657  |
| ITIH4       | 0.409991  |
| SLC39A5     | 0.406972  |
| PROS1       | 0.40494   |
| IL12A_IL12B | 0.403578  |
| STAB2       | 0.403545  |
| TREM2       | 0.403067  |
| BGLAP       | 0.402413  |
| RNASE4      | 0.399916  |
| KCNC4       | 0.396465  |
| MARCO       | 0.39161   |
| CCL16       | 0.390684  |
| PRG3        | 0.390535  |
| NHLRC3      | 0.388905  |
| LGALS1      | 0.388321  |
| NDUFS6      | 0.386605  |
| CRTAC1      | 0.380419  |
| SSC5D       | 0.380055  |
| ADGRF5      | 0.378654  |
| TOMM20      | 0.37852   |
| CD80        | 0.378502  |
| CFI         | 0.376624  |
| KLRF1       | 0.37586   |
| TGFBR1      | 0.375717  |
| PRCP        | 0.374769  |
| ITGB2       | 0.373823  |

**Supplemental Table S1: Top 50 circulating proteins that correlate with CCL24**

|                                                     | Healthy controls | PSC (UCL Bio-Bank and SPRING trial) |
|-----------------------------------------------------|------------------|-------------------------------------|
| <b>N</b>                                            | 14               | 17                                  |
| <b>Age [y], median (range)</b>                      | 28.5 (25-38)     | 31 (25-37)                          |
| <b>Duration since diagnosis [y], median (range)</b> | NA               | 2.1 (0-10.1)                        |
| <b>Male, n (%)</b>                                  | 14 (100)         | 12 (71)                             |
| <b>IBD any, n (%)</b>                               | 0 (0)            | 10 (59)                             |
| <b>ALP [U/L], median (range)</b>                    | 66.5 (46-95)     | 297 (63-1064)                       |
| <b>ALT [U/L], median (range)</b>                    | 16.5 (8-36)      | 127 (31-256)                        |
| <b>AST [U/L], median (range)</b>                    | 19 (15-34)       | 72 (20-218)                         |
| <b>Bilirubin [mg/dL], median (range)</b>            | 11 (7-18)        | 15 (5-38)                           |
| <b>Fibroscan, median (range)</b>                    | NA               | 8.8 (5.0-13.6)                      |
| <b>ELF, n, median (range)</b>                       | NA               | 12, 9.03 (7.85-11.31)               |

**Supplemental Table S8: Characteristics table of age-matched groups**
